# Supplementary material for: Early Initiation of Dapagliflozin during Hospitalization for Acute Heart Failure Is Associated with a Shorter Hospital Stay
Source: PubMed Central journal article supplement — Intern Med. 2023 Mar 15;62(21):3107–17. doi: 10.2169/internalmedicine.1215-22 (PMC10686722; doi:10.2169/internalmedicine.1215-22), 2023-03-15
Supplement: 1349-7235-62-3107-s001.pdf [file 1349-7235-62-3107-s001.pdf]

**Supplemental Table 1.** Comparison of composite events risk between patients divided into two groups by the median time to initiation of dapagliflozin after hospital admission (early initiation, i.e., by day 6, group E; late initiation, i.e., on day 7 or later, group L)

|                                        | Group E<br>(n=63) | Group L<br>(n=55) | P value |
|----------------------------------------|-------------------|-------------------|---------|
| Composite events within 30 days, n (%) | 1 (1.72)          | 0 (0)             | 0.26    |
| Composite events within 90 days, n (%) | 3 (5.17)          | 3 (6.12)          | 0.83    |

Composite events; all-cause death or rehospitalization for heart failure.
