# Supplementary material for: Early Initiation of Dapagliflozin during Hospitalization for Acute Heart Failure Is Associated with a Shorter Hospital Stay
Source: PubMed Central journal article supplement — Intern Med. 2023 Mar 15;62(21):3107–17. doi: 10.2169/internalmedicine.1215-22 (PMC10686722; doi:10.2169/internalmedicine.1215-22), 2023-03-15
Supplement: 1349-7235-62-3107-s002.pdf [file 1349-7235-62-3107-s002.pdf]

**Supplemental Table 2.** Association between time from admission to initiation of dapagliflozin and the length of hospital stay.

| <i>Variables</i>                                          | the length of hospital stay (days) |         |                                          |         |
|-----------------------------------------------------------|------------------------------------|---------|------------------------------------------|---------|
|                                                           | Univariable correlation analysis   |         | Multivariable linear regression analysis |         |
|                                                           | r coefficient                      | P value | Standardized $\beta$                     | P value |
| Time from admission to initiation of dapagliflozin (days) | 0.46                               | <0.001  | 0.48                                     | <0.001  |
| Age (years)                                               | -0.058                             | 0.53    | -0.12                                    | 0.16    |
| ln NT-pro BNP                                             | 0.060                              | 0.51    | 0.038                                    | 0.66    |
| eGFR at admission (mL/min/1.73 m <sup>2</sup> )           | -0.011                             | 0.90    | -0.079                                   | 0.40    |

eGFR, estimated glomerular filtration rate; ln, natural log; NT pro-BNP, N-terminal pro-brain natriuretic peptide
