# Supplementary material for: Early Initiation of Dapagliflozin during Hospitalization for Acute Heart Failure Is Associated with a Shorter Hospital Stay
Source: PubMed Central journal article supplement — Intern Med. 2023 Mar 15;62(21):3107–17. doi: 10.2169/internalmedicine.1215-22 (PMC10686722; doi:10.2169/internalmedicine.1215-22), 2023-03-15
Supplement: 1349-7235-62-3107-s003.pdf [file 1349-7235-62-3107-s003.pdf]

**Supplemental Table 3.** Propensity score matching of baseline characteristics of patients divided into two groups by the median time to initiation of dapagliflozin after hospital admission (early initiation, i.e., by day 6, group E; late initiation, i.e., on day 7 or later, group L)

|                                                               | Group E<br>(n=28) | Group L<br>(n=28) | P value      |
|---------------------------------------------------------------|-------------------|-------------------|--------------|
| <b><i>Demographic variables</i></b>                           |                   |                   |              |
| Age, median (IQR), y                                          | 70 (58, 78)       | 75 (62, 81)       | 0.37         |
| Male sex, n (%)                                               | 20 (71.4)         | 20 (71.4)         | 1.00         |
| Body mass index at admission, median (IQR), kg/m <sup>2</sup> | 27.7 (23.7, 33.0) | 25.9 (22.8, 29.4) | 0.27         |
| Systolic BP at admission, mean±SD, mmHg                       | 146±38            | 151±27            | 0.62         |
| Type 2 diabetes, n (%)                                        | 12 (42.8)         | 10 (35.7)         | 0.58         |
| Hypertension, n (%)                                           | 22 (78.5)         | 24 (85.7)         | 0.48         |
| COPD, n (%)                                                   | 2 (7.1)           | 3 (11.1)          | 0.60         |
| Atrial fibrillation, n (%)                                    | 10 (35.7)         | 10 (35.7)         | 1.00         |
| Ischemic etiology, n (%)                                      | 7 (25.0)          | 10 (35.7)         | 0.26         |
| HFpEF, n (%)                                                  | 10 (35.7)         | 9 (32.1)          | 0.77         |
| NYHA class ≥III, n (%)                                        | 22 (78.5)         | 20 (71.4)         | 0.53         |
| <b><i>Medications at discharge</i></b>                        |                   |                   |              |
| ACE-I or ARB, n (%)                                           | 17 (60.7)         | 11 (39.2)         | 0.10         |
| ARNI, n (%)                                                   | 9 (32.1)          | 10 (35.7)         | 0.77         |
| Beta-blocker, n (%)                                           | 25 (89.2)         | 25 (89.2)         | 1.00         |
| Ivabradine, n (%)                                             | 2 (7.1)           | 2 (7.1)           | 1.00         |
| Aldosterone antagonists, n (%)                                | 21 (75.0)         | 16 (57.1)         | 0.15         |
| Loop diuretic, n (%)                                          | 24 (85.7)         | 20 (74.0)         | 0.27         |
| Tolvaptan, n (%)                                              | 11 (39.2)         | 9 (32.1)          | 0.57         |
| DPP4-I, n (%)                                                 | 8 (28.5)          | 4 (14.2)          | 0.18         |
| <b><i>Laboratory variables at admission</i></b>               |                   |                   |              |
| Hemoglobin, mean±SD, g/dL                                     | 12.4±2.1          | 12.4±2.2          | 0.94         |
| Hematocrit, mean±SD, %                                        | 38.8±6.1          | 38.8±6.4          | 0.88         |
| Total bilirubin, median (IQR), mg/dL                          | 0.84 (0.51, 1.27) | 0.98 (0.64, 1.41) | 0.30         |
| AST, median (IQR), U/L                                        | 32 (24, 51)       | 27 (20, 38)       | 0.16         |
| ALT, median (IQR), U/L                                        | 28 (20, 52)       | 19 (12, 35)       | <b>0.045</b> |
| Albumin, median (IQR), g/dL                                   | 3.6 (3.3, 3.9)    | 3.5 (3.2, 3.9)    | 0.62         |
| Sodium, median (IQR), mEq/L                                   | 141 (139, 142)    | 140 (138, 143)    | 0.67         |

|                                                 |                    |                    |      |
|-------------------------------------------------|--------------------|--------------------|------|
| BUN, median (IQR), mg/dL                        | 17.8 (15.2, 27.6)  | 20.2 (15.1, 24.1)  | 0.92 |
| Cr, median (IQR), mg/dL                         | 1.05 (0.86, 1.35)  | 0.98 (0.82, 1.40)  | 0.65 |
| eGFR, mean±SD, mL/min/1.73 m <sup>2</sup>       | 51.0±18.2          | 52.5±17.0          | 0.76 |
| NT pro-BNP, median (IQR), pg/mL                 | 4206 (2178, 8222)  | 3454 (2050, 8546)  | 0.83 |
| ePVS, median (IQR), dL/g                        | 4.87 (3.89, 5.63)  | 4.92 (4.22, 6.22)  | 0.94 |
| <b>Laboratory variables at discharge</b>        |                    |                    |      |
| Hemoglobin, median (IQR), g/dL                  | 13.1 (12.1, 15.1)  | 11.9 (10.8, 14.4)  | 0.11 |
| Hematocrit, median (IQR), %                     | 40.8 (38.1, 47.5)  | 37.8 (35.0, 43.9)  | 0.12 |
| Total bilirubin, median (IQR), mg/dL            | 0.66 (0.51, 1.00)  | 0.58 (0.41, 0.86)  | 0.15 |
| AST, median (IQR), U/L                          | 22 (18, 34)        | 22 (17, 33)        | 0.45 |
| ALT, median (IQR), U/L                          | 18 (14, 41)        | 25 (10, 38)        | 0.91 |
| Albumin, mean±SD, g/dL                          | 3.6±0.4            | 3.5±0.4            | 0.47 |
| Sodium, median (IQR), mEq/L                     | 140 (138, 142)     | 140 (138, 141)     | 0.98 |
| BUN, median (IQR), mg/dL                        | 21.7 (17.8, 30.9)  | 25.1 (17.7, 30.5)  | 0.87 |
| Cr, median (IQR), mg/dL                         | 1.11 (0.90, 1.40)  | 1.10 (0.87, 1.42)  | 0.77 |
| eGFR, median (IQR), mL/min/1.73 m <sup>2</sup>  | 44.8 (31.6, 58.7)  | 48.0 (34.7, 61.6)  | 0.72 |
| NT pro-BNP, median (IQR), pg/mL                 | 1150 (576, 2169)   | 960 (445, 1439)    | 0.71 |
| ePVS, median (IQR), dL/g                        | 4.46±1.09          | 4.87±1.33          | 0.21 |
| ΔePVS, median (IQR), dL/g                       | 0.51 (-0.03, 0.93) | 0.33 (-0.36, 0.93) | 0.30 |
| <b>Echocardiographic variables at admission</b> |                    |                    |      |
| LVDd, mean±SD, mm                               | 58±8               | 54±11              | 0.18 |
| LVEF, median (IQR), %                           | 40 (31, 59)        | 40 (30, 51)        | 0.44 |
| LAD, median (IQR), mm                           | 45 (39, 51)        | 44 (40, 48)        | 0.94 |
| E, mean±SD, m/s                                 | 94±29              | 90±28              | 0.61 |
| E/e' ratio, median (IQR)                        | 14.2 (11.9, 26.2)  | 18.0 (15.3, 20.8)  | 0.27 |
| RVDD, mean±SD, mm                               | 36±8               | 35±6               | 0.94 |
| Moderate or severe TR, n (%)                    | 8 (28.5)           | 9 (37.5)           | 0.49 |
| TRPG, median (IQR), mmHg                        | 29 (21, 37)        | 28 (21, 37)        | 0.80 |
| Maximal IVC diameter, mean±SD, mm               | 18±5               | 18±5               | 0.93 |

For multiple comparisons, analysis of variance was used for symmetrical continuous variables, the Kruskal-Wallis test was used for asymmetric continuous variables, and the chi-squared test was used for categorical variables.

ACE-I, angiotensin converting enzyme inhibitor; ALT, alanine aminotransferase; ARB, angiotensin II receptor blocker; ARNI, angiotensin receptor-neprilysin inhibitor; AST, aspartate aminotransferase; BP, blood pressure; BUN, blood urea nitrogen; COPD, chronic obstructive pulmonary disease; Cr, creatinine; DPP4-I, dipeptidyl peptidase-4

inhibitor; E, peak early diastolic transmitral flow velocity; e', peak early diastolic mean mitral annular velocity; eGFR, estimated glomerular filtration rate; ePVS, estimated plasma volume status; HFpEF, heart failure with preserved ejection fraction; IQR, interquartile range; IVC, inferior vena cava; LAD, left atrial dimension; LVDd, left ventricular end-diastolic dimension; LVEF, left ventricular ejection fraction; NT pro-BNP, N-terminal pro-brain natriuretic peptide; NYHA, New York Heart Association; RVDd, right ventricular end-diastolic dimension; TR, tricuspid regurgitation; TRPG, tricuspid regurgitation pressure gradient.
